# Supplementary material
Source: publisher figshare collection journal article supplement (https://tandf.figshare.com/ndownloader/files/13152428)
Supplement: Supplementary file 1 [file 13152428]

**Supplementary Material**

**Table SM1:** Sorption isothermal equations

| Isotherm | Equation | References |
| --- | --- | --- |
| Langmuir | 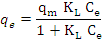 | [18] |
| Freundlich | 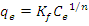 | [19] |
| Ce (mg L−1): equilibrium concentration of Ag(I) in solution.  qe (mg g−1): amount of sorbed Ag(I) at equilibrium.  qm (mg g−1): Langmuir maximum sorption capacity.  KL (L mg−1): Langmuir constant related to affinity of sorptive sites.  Kf (mg g−1) (L mg−1)1/n: Freundlich constant relative sorption capacity.  n: Freundlich constants related to the sorption capacity and intensity | | |

**Table SM2: A comparison between the maximum sorption capacity *q*m(mg g−1) of MB by MGOLS and other reported GO-based adsorbents.**

| Nanosorbent | *q*m(mg.g−1) | reference |
| --- | --- | --- |
| GO-Fe3O4 | 84 | [SM1] |
| GO-cyclodextrin-chitosan@Fe3O4 | 97 | [SM2] |
| Graphene-Fe3O4/SiO2 | 95 | [SM3] |
| GO-CS-Fe3O4 | 167 | [SM4] |
| MWCNT-starch-iron oxide | 136 | [SM5] |
| Fe3O4@C NPs | 117 | [SM6] |
| Fe3O4-Graphene sponge | 526 | [SM7] |
| MGOLS | 632.7 | This study |

**Table SM3:** Kinetics models

| Kinetic model | Equation | References |
| --- | --- | --- |
| Pseudo-First order |  | [29] |
| Pseudo-Second order |  | [30] |
| Elovich equation |  | [31] |
| Intraparticle diffusion |  | [32] |
| qt (mg g−1): amount of metal sorbed at time (t).  qe (mg g−1): equilibrium sorption.  K1 (L mg−1): pseudo first -order rate constant of sorption.  K2 (g mg−1 min−1): pseudo second-order rate constant of sorption.  Kint (mg g−1 min-0.5): the intra-particle diffusion rate.  X (mg g−1):the boundary layer diffusion effects (external film resistance)  α (mg g−1 min−1): the initial sorption rate.  β (g mg−1): the desorption constant. | | |


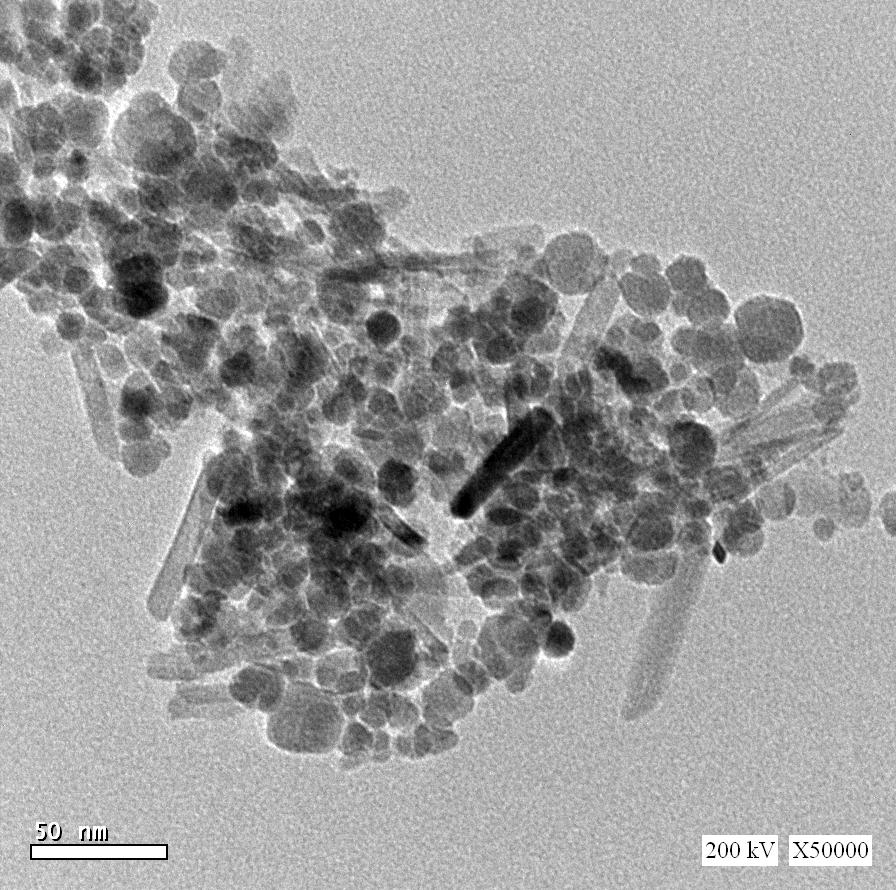


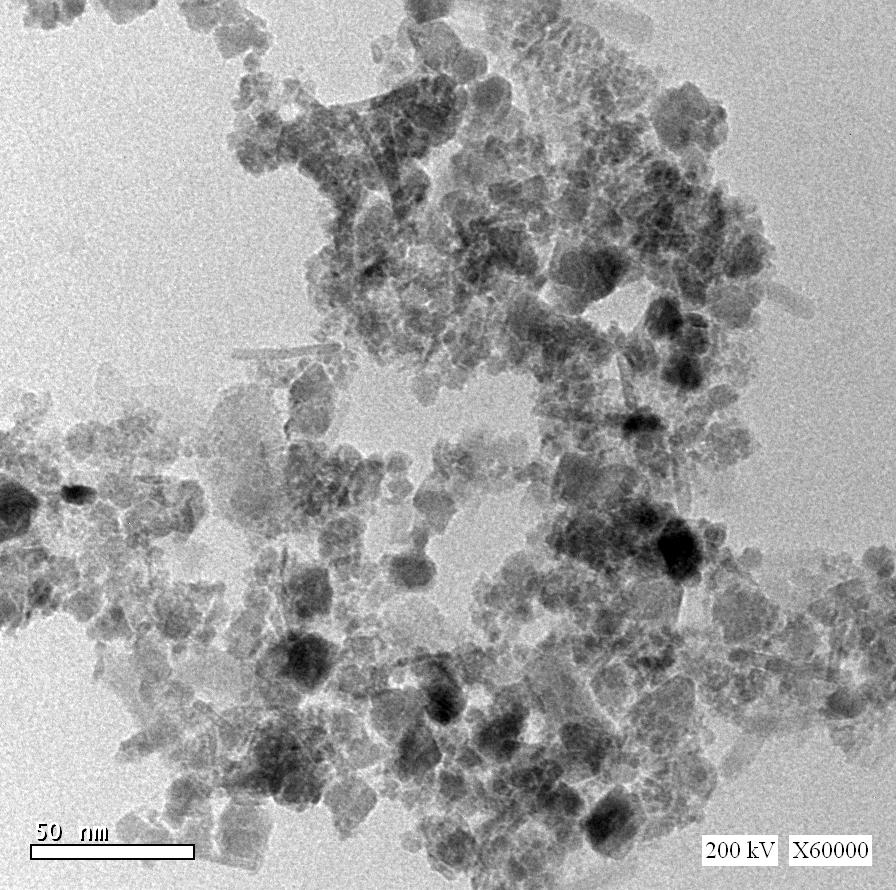
**(a)**

**(b)**

**Fig. SM1:** TEM of MGOLS nanosorbents

**(a)**

**(b)**

**Fig. SM2:** Linearized plots for sorption isotherms: (a) Langmuir equation, (b) Freundlich equation

**(a)**

**(b)**

**Fig. SM3:** Modeling of uptake kinetics with: (a) PFORE, (b) PSORE

**(a)**

**(b)**

**Fig. SM4:** Modeling of uptake kinetics with (a) Elovich equation, (b) simplified model of resistance to intraparticle diffusion (Morris and Weber equation)

**References**

[SM1] Xie, G.; Xi, P.; Liu, H.; Chen, F.; Huang, L.; Shi, Y.; Hou, F.; Zeng Z.; Shao, C.; Wang, J. A facile chemical method to produce super-paramagnetic graphene oxide–Fe3O4 hybrid composite and its application in the removal of dyes from aqueous solution. J. Mater. Chem. **2012,** 22, 1033–1039. DOI: 10.1039/C1JM13433G

[SM2] Fan, L.; Luo, C.; Sun, M.; Qiu, H.; Li, X. Synthesis of magnetic β- cyclodextrin chitosan/graphene oxide as nanosorbent and its application in dye adsorption and removal. Colloids Surf. B **2013,** 103, 601–607. [DOI: 10.1016/j.colsurfb.2012.11.023](https://doi.org/10.1016/j.colsurfb.2012.11.023)

[SM3] Yao, Y.; Miao, S.; Yu, S.; Ma, L.; Sun, H; Wang, S. Fabrication of Fe3O4/SiO2 core/shell nanoparticles attached to graphene oxide and its use as an adsorbent. J. Colloid Interface Sci. **2012,** 379, 20–26. DOI: 10.1016/j.jcis.2012.04.030

[SM4] Fan, L.; Luo, C.; Li, X.; Lu, F.; Qiu, H.; Sun, M. Fabrication of novel magnetic chitosan grafted with graphene oxide to enhance adsorption properties for methyl blue. *J. Hazard. Mater*., **2012,** 215–216, 272–279. [DOI: 10.1016/j.jhazmat.2012.02.068](https://doi.org/10.1016/j.jhazmat.2012.02.068)

[SM5] Chang, P.; Zheng, B.; Liu, D. P.; Anderson, J. Y.; Ma, X. Characterization of magnetic soluble starch-functionalized carbon nanotubes and its application for the adsorption of the dyes. J. Hazard. Mater. **2011,** 186, 2144–2150. [DOI: 10.1016/j.jhazmat.2010.12.119](https://doi.org/10.1016/j.jhazmat.2010.12.119)

[SM6] Wu, R.; Liu, J.-H.; Zhao, L.; Zhang, X.; Xie, J.; Yu B.; Ma X.; Yang S.-T.; Wang, H.; Y. Liu. Hydrothermal preparation of magnetic Fe3O4@C nanoparticles for dye adsorption. J. Environ. Chem. Eng. **2014,** 2, 907–913. [DOI: 10.1016/j.jece.2014.02.005](https://doi.org/10.1016/j.jece.2014.02.005)

[SM7] Yu, B.; Zhang, X.; Xie, J.; Wu, R.; Liu, X.; Li, H.; Chen, F.; Yang, H.; Ming, Z.; Yang, S.-T. Magnetic graphene sponge for the removal of methylene blue. Appl. Surf. Sci. **2015,** 351, 765–771. [DOI: 10.1016/j.apsusc.2015.05.185](https://doi.org/10.1016/j.apsusc.2015.05.185)
